# Supplementary material
Source: Springer Nature journal article supplement (https://www.springerprofessional.de/resource/supplementary/13638_2010_85_MOESM2_ESM.pdf/11897374)
Supplement: MOESM2 [file 11897374]

---



---

 Uploading
 

---

**1. System Parameter Generation**

$$\lambda = (f(\cdot), h(\cdot), q)$$

**2. Key Generation**

Keep the KEY MATCHING Table

$$\leftarrow \frac{\{gk\}}{\text{Transfer}}$$

**3. Index Generation and Document Encryption**

$$\frac{\{f_{gk_i^j}(d_n), f_{gk_i^j}(D_n), f_{gk_i^j}(w_{n,1}), f_{gk_i^j}(w_{n,2}), \dots\}}{\longrightarrow}$$

**4. Database Update**Decrypt  $\rightarrow$  Re-encrypt;

$$\frac{\{f_{k_c}(d_n), f_{dk_i}(D_n), f_{ik_i}(w_{n,1}), \dots\}}{\longrightarrow}$$

Insert to Database

---



---

 Downloading
 

---

**1. Trapdoor Generation**

$$\frac{\{g_i, f_{gk_i^j}(w)\}}{\longrightarrow} \xrightarrow{\text{Decrypt} \rightarrow \text{Re-encrypt};}$$

$$\frac{T_w = f_{ik_i}(w)}{\longrightarrow}$$

**2. Retrieval**

Index List

Encrypted Document

Return;

$$\leftarrow \frac{\{f_{dk_i}(D_t)\}}{\longrightarrow}$$

**3. Decryption**

$$\frac{\{f_{gk_i^j}(D_t)\}}{\longleftarrow}$$

$$\{D_t\}$$


---
